# Supplementary material
Source: publisher figshare collection journal article supplement (https://acs.figshare.com/ndownloader/files/3842803)
Supplement: Supplementary file 1 [file 3842803]

 
data_b
 
_audit_creation_method            SHELXL-97
_chemical_name_systematic
;
 ?
;
_chemical_name_common             ?
_chemical_melting_point           ?
_chemical_formula_moiety           'C28 H44 O4 Si2'
_chemical_formula_sum              'C28 H44 O4 Si2'
_chemical_formula_weight          500.81
_chemical_absolute_configuration  ad
 
loop_
 _atom_type_symbol
 _atom_type_description
 _atom_type_scat_dispersion_real
 _atom_type_scat_dispersion_imag
 _atom_type_scat_source
 'C'  'C'   0.0181   0.0091
 'International Tables Vol C Tables 4.2.6.8 and 6.1.1.4'
 'H'  'H'   0.0000   0.0000
 'International Tables Vol C Tables 4.2.6.8 and 6.1.1.4'
 'O'  'O'   0.0492   0.0322
 'International Tables Vol C Tables 4.2.6.8 and 6.1.1.4'
 'Si'  'Si'   0.2541   0.3302
 'International Tables Vol C Tables 4.2.6.8 and 6.1.1.4'
 
_symmetry_cell_setting            orthorhombic
_symmetry_space_group_name_H-M    'P 21 21 21'
 
loop_
 _symmetry_equiv_pos_as_xyz
 'x, y, z'
 'x+1/2, -y+1/2, -z'
 '-x, y+1/2, -z+1/2'
 '-x+1/2, -y, z+1/2'
 
_cell_length_a                    7.70200(10)
_cell_length_b                    13.1321(2)
_cell_length_c                    27.4999(19)
_cell_angle_alpha                 90.00
_cell_angle_beta                  90.00
_cell_angle_gamma                 90.00
_cell_volume                      2781.4(2)
_cell_formula_units_Z             4
_cell_measurement_temperature     113(2)
_cell_measurement_reflns_used     20493
_cell_measurement_theta_min       6.60
_cell_measurement_theta_max       68.20
 
_exptl_crystal_description        prism
_exptl_crystal_colour             colorless
_exptl_crystal_size_max           0.20
_exptl_crystal_size_mid           0.20
_exptl_crystal_size_min           0.20
_exptl_crystal_density_meas       ?
_exptl_crystal_density_diffrn     1.196
_exptl_crystal_density_method     'not measured'
_exptl_crystal_F_000              1088
_exptl_absorpt_coefficient_mu     1.395
_exptl_absorpt_correction_type    multi-scan
_exptl_absorpt_correction_T_min   0.651
_exptl_absorpt_correction_T_max   0.837
_exptl_absorpt_process_details    'Jacobson, R. (1998) Private communication'
 
_exptl_special_details
;
 ?
;
 
_diffrn_ambient_temperature       113(2)
_diffrn_radiation_wavelength      1.54178
_diffrn_radiation_type            CuK\a
_diffrn_radiation_source          'fine-focus sealed tube'
_diffrn_radiation_monochromator   graphite
_diffrn_measurement_device_type   'Rigaku Saturn944+ CCD'
_diffrn_measurement_method        \w
_diffrn_detector_area_resol_mean  ?
_diffrn_standards_number          ?
_diffrn_standards_interval_count  ?
_diffrn_standards_interval_time   ?
_diffrn_standards_decay_%         ?
_diffrn_reflns_number             21439
_diffrn_reflns_av_R_equivalents   0.0436
_diffrn_reflns_av_sigmaI/netI     0.0404
_diffrn_reflns_limit_h_min        -8
_diffrn_reflns_limit_h_max        9
_diffrn_reflns_limit_k_min        -15
_diffrn_reflns_limit_k_max        15
_diffrn_reflns_limit_l_min        -32
_diffrn_reflns_limit_l_max        32
_diffrn_reflns_theta_min          6.59
_diffrn_reflns_theta_max          68.23
_reflns_number_total              4975
_reflns_number_gt                 4681
_reflns_threshold_expression      >2\s(I)
 
_computing_data_collection
                                   'CrystalClear-SM Auto 2.0 r4 (Rigaku, 2009)'
_computing_cell_refinement             'CrystalClear-SM Auto 2.0 r4'
_computing_data_reduction              'CrystalClear-SM Auto 2.0 r4'
_computing_structure_solution          'SHELXS97 (Sheldrick, 1997)'
_computing_structure_refinement        'SHELXL97 (Sheldrick, 1997)'
_computing_publication_material        'CrystalStructure 4.0 (Rigaku, 2009)'
_computing_molecular_graphics          'CrystalStructure 4.0'
 
_refine_special_details
;
 Refinement of F^2^ against ALL reflections.  The weighted R-factor wR and
 goodness of fit S are based on F^2^, conventional R-factors R are based
 on F, with F set to zero for negative F^2^. The threshold expression of
 F^2^ > 2\s(F^2^) is used only for calculating R-factors(gt) etc. and is
 not relevant to the choice of reflections for refinement.  R-factors based
 on F^2^ are statistically about twice as large as those based on F, and R-
 factors based on ALL data will be even larger.
;
 
_refine_ls_structure_factor_coef  Fsqd
_refine_ls_matrix_type            full
_refine_ls_weighting_scheme       calc
_refine_ls_weighting_details
 'calc w=1/[\s^2^(Fo^2^)+(0.0257P)^2^+1.2922P] where P=(Fo^2^+2Fc^2^)/3'
_atom_sites_solution_primary      direct
_atom_sites_solution_secondary    difmap
_atom_sites_solution_hydrogens    geom
_refine_ls_hydrogen_treatment     mixed
_refine_ls_extinction_method      SHELXL
_refine_ls_extinction_coef        0.0028(2)
_refine_ls_extinction_expression
 'Fc^*^=kFc[1+0.001xFc^2^\l^3^/sin(2\q)]^-1/4^'
_refine_ls_abs_structure_details
 'Flack H D (1983), Acta Cryst. A39, 876-881. 2117 Friedel Pairs'
_refine_ls_abs_structure_Flack    0.02(2)
_refine_ls_number_reflns          4975
_refine_ls_number_parameters      317
_refine_ls_number_restraints      1
_refine_ls_R_factor_all           0.0375
_refine_ls_R_factor_gt            0.0326
_refine_ls_wR_factor_ref          0.0861
_refine_ls_wR_factor_gt           0.0727
_refine_ls_goodness_of_fit_ref    1.143
_refine_ls_restrained_S_all       1.144
_refine_ls_shift/su_max           0.001
_refine_ls_shift/su_mean          0.000
 
loop_
 _atom_site_label
 _atom_site_type_symbol
 _atom_site_fract_x
 _atom_site_fract_y
 _atom_site_fract_z
 _atom_site_U_iso_or_equiv
 _atom_site_adp_type
 _atom_site_occupancy
 _atom_site_symmetry_multiplicity
 _atom_site_calc_flag
 _atom_site_refinement_flags
 _atom_site_disorder_assembly
 _atom_site_disorder_group
Si1 Si 0.45947(7) 0.75178(4) 0.86455(2) 0.02190(15) Uani 1 1 d . . .
Si2 Si 1.00910(8) 0.59604(5) 0.56592(2) 0.02416(15) Uani 1 1 d . . .
O1 O 0.74362(19) 0.82361(11) 0.64202(6) 0.0251(3) Uani 1 1 d . . .
O2 O 0.66128(19) 0.83194(12) 0.76368(6) 0.0244(4) Uani 1 1 d D . .
HO2 H 0.764(2) 0.835(2) 0.7651(9) 0.029 Uiso 1 1 d D . .
O3 O 0.4961(2) 0.72670(11) 0.62258(5) 0.0254(3) Uani 1 1 d . . .
O4 O 0.02097(19) 0.80622(13) 0.76638(6) 0.0307(4) Uani 1 1 d . . .
C1 C 0.0595(3) 0.6322(2) 0.98093(9) 0.0350(6) Uani 1 1 d . . .
H1 H -0.0217 0.6079 1.0042 0.042 Uiso 1 1 calc R . .
C2 C 0.0768(3) 0.7353(2) 0.97269(9) 0.0323(6) Uani 1 1 d . . .
H2 H 0.0082 0.7824 0.9905 0.039 Uiso 1 1 calc R . .
C3 C 0.1944(3) 0.77016(18) 0.93832(8) 0.0272(5) Uani 1 1 d . . .
H3 H 0.2048 0.8414 0.9329 0.033 Uiso 1 1 calc R . .
C4 C 0.2979(3) 0.70362(17) 0.91143(8) 0.0223(5) Uani 1 1 d . . .
C5 C 0.4219(3) 0.66834(16) 0.80892(8) 0.0218(5) Uani 1 1 d . . .
H5 H 0.4020 0.5988 0.8226 0.026 Uiso 1 1 calc R . .
C6 C 0.2596(3) 0.68882(17) 0.77735(8) 0.0230(5) Uani 1 1 d . . .
C7 C 0.3029(3) 0.77691(16) 0.74320(8) 0.0206(5) Uani 1 1 d . . .
H7 H 0.3412 0.8333 0.7652 0.025 Uiso 1 1 calc R . .
C8 C 0.4502(3) 0.76488(15) 0.70692(8) 0.0205(4) Uani 1 1 d . . .
C9 C 0.4654(3) 0.86447(15) 0.67571(8) 0.0217(5) Uani 1 1 d . . .
H9 H 0.5383 0.9157 0.6932 0.026 Uiso 1 1 calc R . .
C10 C 0.5629(3) 0.82490(17) 0.63134(8) 0.0239(5) Uani 1 1 d . . .
H10 H 0.5400 0.8699 0.6027 0.029 Uiso 1 1 calc R . .
C11 C 0.8450(3) 0.77543(17) 0.60433(8) 0.0260(5) Uani 1 1 d . . .
H11A H 0.9549 0.8136 0.6001 0.031 Uiso 1 1 calc R . .
H11B H 0.7802 0.7790 0.5733 0.031 Uiso 1 1 calc R . .
C12 C 0.8870(3) 0.66500(17) 0.61534(8) 0.0248(5) Uani 1 1 d . . .
H12A H 0.7769 0.6283 0.6215 0.030 Uiso 1 1 calc R . .
H12B H 0.9566 0.6623 0.6456 0.030 Uiso 1 1 calc R . .
C13 C 1.1208(3) 0.48416(19) 0.59364(10) 0.0333(6) Uani 1 1 d . . .
H13A H 1.0364 0.4432 0.6117 0.050 Uiso 1 1 calc R . .
H13B H 1.2118 0.5079 0.6158 0.050 Uiso 1 1 calc R . .
H13C H 1.1731 0.4426 0.5679 0.050 Uiso 1 1 calc R . .
C14 C 0.6833(3) 0.72783(17) 0.88800(9) 0.0283(5) Uani 1 1 d . . .
H14A H 0.7683 0.7584 0.8659 0.042 Uiso 1 1 calc R . .
H14B H 0.7036 0.6543 0.8901 0.042 Uiso 1 1 calc R . .
H14C H 0.6954 0.7582 0.9204 0.042 Uiso 1 1 calc R . .
C15 C 0.5803(3) 0.65489(16) 0.77410(9) 0.0237(5) Uani 1 1 d . . .
H15A H 0.6857 0.6456 0.7942 0.028 Uiso 1 1 calc R . .
H15B H 0.5631 0.5914 0.7553 0.028 Uiso 1 1 calc R . .
C16 C 0.6141(3) 0.74204(16) 0.73811(8) 0.0207(4) Uani 1 1 d . . .
H16 H 0.7116 0.7222 0.7160 0.025 Uiso 1 1 calc R . .
C17 C 0.4274(3) 0.68487(17) 0.66650(8) 0.0246(5) Uani 1 1 d . . .
H17A H 0.4901 0.6216 0.6751 0.030 Uiso 1 1 calc R . .
H17B H 0.3029 0.6684 0.6623 0.030 Uiso 1 1 calc R . .
C18 C 0.8525(4) 0.55290(19) 0.51877(10) 0.0382(6) Uani 1 1 d . . .
H18A H 0.8080 0.6121 0.5010 0.057 Uiso 1 1 calc R . .
H18B H 0.7557 0.5171 0.5344 0.057 Uiso 1 1 calc R . .
H18C H 0.9111 0.5067 0.4961 0.057 Uiso 1 1 calc R . .
C19 C 1.1719(4) 0.6835(2) 0.53724(10) 0.0386(6) Uani 1 1 d . . .
H19A H 1.2417 0.6454 0.5136 0.058 Uiso 1 1 calc R . .
H19B H 1.2479 0.7117 0.5624 0.058 Uiso 1 1 calc R . .
H19C H 1.1111 0.7391 0.5206 0.058 Uiso 1 1 calc R . .
C20 C 0.2895(3) 0.91171(17) 0.66247(9) 0.0250(5) Uani 1 1 d . . .
C21 C 0.2494(3) 0.94770(18) 0.61922(9) 0.0326(6) Uani 1 1 d . . .
H21A H 0.3322 0.9454 0.5936 0.039 Uiso 1 1 calc R . .
H21B H 0.1376 0.9760 0.6136 0.039 Uiso 1 1 calc R . .
C22 C 0.1516(3) 0.91687(18) 0.70265(9) 0.0289(5) Uani 1 1 d . . .
H22A H 0.1882 0.9653 0.7283 0.035 Uiso 1 1 calc R . .
H22B H 0.0397 0.9405 0.6890 0.035 Uiso 1 1 calc R . .
C23 C 0.1315(3) 0.81098(18) 0.72392(8) 0.0237(5) Uani 1 1 d . . .
H23 H 0.0892 0.7626 0.6985 0.028 Uiso 1 1 calc R . .
C24 C 0.0973(3) 0.73680(19) 0.80197(8) 0.0276(5) Uani 1 1 d . . .
H24A H 0.0130 0.6832 0.8111 0.033 Uiso 1 1 calc R . .
H24B H 0.1313 0.7743 0.8317 0.033 Uiso 1 1 calc R . .
C25 C 0.2009(3) 0.59052(18) 0.75162(9) 0.0297(5) Uani 1 1 d . . .
H25A H 0.1016 0.6055 0.7305 0.045 Uiso 1 1 calc R . .
H25B H 0.1671 0.5398 0.7760 0.045 Uiso 1 1 calc R . .
H25C H 0.2967 0.5637 0.7320 0.045 Uiso 1 1 calc R . .
C26 C 0.4294(3) 0.89265(16) 0.85814(9) 0.0261(5) Uani 1 1 d . . .
H26A H 0.4579 0.9261 0.8890 0.039 Uiso 1 1 calc R . .
H26B H 0.3084 0.9072 0.8496 0.039 Uiso 1 1 calc R . .
H26C H 0.5062 0.9184 0.8325 0.039 Uiso 1 1 calc R . .
C27 C 0.2787(3) 0.59970(19) 0.92068(9) 0.0300(5) Uani 1 1 d . . .
H27 H 0.3473 0.5521 0.9031 0.036 Uiso 1 1 calc R . .
C28 C 0.1610(4) 0.5648(2) 0.95514(10) 0.0382(6) Uani 1 1 d . . .
H28 H 0.1504 0.4938 0.9610 0.046 Uiso 1 1 calc R . .
 
loop_
 _atom_site_aniso_label
 _atom_site_aniso_U_11
 _atom_site_aniso_U_22
 _atom_site_aniso_U_33
 _atom_site_aniso_U_23
 _atom_site_aniso_U_13
 _atom_site_aniso_U_12
Si1 0.0166(3) 0.0205(3) 0.0286(3) -0.0010(3) 0.0021(2) -0.0006(2)
Si2 0.0236(3) 0.0226(3) 0.0263(3) -0.0021(2) 0.0005(2) 0.0020(2)
O1 0.0202(8) 0.0249(8) 0.0301(9) -0.0015(7) 0.0062(6) -0.0018(7)
O2 0.0145(7) 0.0255(8) 0.0332(9) -0.0035(7) 0.0005(7) -0.0018(7)
O3 0.0262(8) 0.0256(8) 0.0245(8) -0.0057(6) 0.0032(6) -0.0034(6)
O4 0.0153(8) 0.0455(10) 0.0312(9) 0.0002(7) 0.0026(7) 0.0030(7)
C1 0.0303(13) 0.0467(15) 0.0280(13) 0.0090(11) 0.0016(11) -0.0073(11)
C2 0.0280(12) 0.0419(14) 0.0270(12) 0.0040(11) 0.0017(9) 0.0040(11)
C3 0.0262(12) 0.0283(12) 0.0272(12) 0.0008(10) 0.0000(10) -0.0002(9)
C4 0.0185(11) 0.0271(12) 0.0213(11) 0.0015(9) -0.0051(9) -0.0032(9)
C5 0.0180(10) 0.0175(10) 0.0298(12) 0.0010(9) 0.0046(9) -0.0011(9)
C6 0.0169(10) 0.0255(12) 0.0267(12) -0.0022(10) 0.0049(9) -0.0062(9)
C7 0.0134(10) 0.0207(11) 0.0277(12) -0.0069(9) 0.0006(8) 0.0003(8)
C8 0.0147(10) 0.0171(10) 0.0297(12) -0.0054(9) 0.0006(8) -0.0019(8)
C9 0.0190(11) 0.0192(10) 0.0269(12) -0.0021(9) -0.0014(9) -0.0040(9)
C10 0.0175(11) 0.0253(11) 0.0288(12) -0.0015(10) -0.0014(9) 0.0011(9)
C11 0.0255(12) 0.0236(12) 0.0289(13) -0.0029(9) 0.0093(10) -0.0009(9)
C12 0.0222(11) 0.0245(11) 0.0276(12) 0.0014(10) 0.0032(9) -0.0023(9)
C13 0.0356(14) 0.0279(12) 0.0364(14) -0.0048(11) -0.0077(11) 0.0090(11)
C14 0.0215(11) 0.0245(12) 0.0390(14) -0.0045(11) -0.0036(10) 0.0017(9)
C15 0.0186(11) 0.0216(11) 0.0309(12) -0.0025(9) -0.0004(9) 0.0031(9)
C16 0.0118(9) 0.0189(10) 0.0313(12) -0.0041(9) 0.0011(8) 0.0012(8)
C17 0.0205(11) 0.0219(11) 0.0313(13) -0.0036(10) 0.0046(9) -0.0008(9)
C18 0.0477(16) 0.0297(13) 0.0372(15) -0.0024(11) -0.0144(12) 0.0052(12)
C19 0.0417(15) 0.0374(14) 0.0368(15) -0.0015(12) 0.0124(12) -0.0031(12)
C20 0.0223(12) 0.0193(11) 0.0334(13) -0.0041(10) 0.0000(9) 0.0011(9)
C21 0.0286(13) 0.0309(13) 0.0382(15) 0.0016(11) -0.0017(11) 0.0043(10)
C22 0.0237(12) 0.0297(12) 0.0332(13) -0.0055(11) -0.0022(10) 0.0051(10)
C23 0.0157(10) 0.0322(12) 0.0233(12) -0.0063(10) -0.0011(9) 0.0003(9)
C24 0.0172(11) 0.0344(13) 0.0310(13) -0.0024(11) 0.0034(9) -0.0015(10)
C25 0.0255(12) 0.0271(12) 0.0363(14) -0.0010(11) 0.0026(10) -0.0096(10)
C26 0.0256(12) 0.0216(11) 0.0311(13) -0.0020(10) 0.0029(10) -0.0005(9)
C27 0.0302(13) 0.0284(12) 0.0313(13) 0.0018(10) 0.0007(10) 0.0017(10)
C28 0.0468(16) 0.0305(13) 0.0374(15) 0.0115(11) -0.0027(12) -0.0070(12)
 
_geom_special_details
;
 All s.u.'s (except the s.u. in the dihedral angle between two l.s. planes)
 are estimated using the full covariance matrix.  The cell s.u.'s are taken
 into account individually in the estimation of s.u.'s in distances, angles
 and torsion angles; correlations between s.u.'s in cell parameters are only
 used when they are defined by crystal symmetry.  An approximate (isotropic)
 treatment of cell s.u.'s is used for estimating s.u.'s involving l.s. planes.
;
 
loop_
 _geom_bond_atom_site_label_1
 _geom_bond_atom_site_label_2
 _geom_bond_distance
 _geom_bond_site_symmetry_2
 _geom_bond_publ_flag
Si1 C14 1.867(2) . ?
Si1 C26 1.873(2) . ?
Si1 C4 1.900(2) . ?
Si1 C5 1.904(2) . ?
Si2 C18 1.859(3) . ?
Si2 C13 1.866(2) . ?
Si2 C19 1.874(3) . ?
Si2 C12 1.885(2) . ?
O1 C10 1.423(3) . ?
O1 C11 1.444(3) . ?
O2 C16 1.421(3) . ?
O2 HO2 0.795(17) . ?
O3 C10 1.409(3) . ?
O3 C17 1.429(3) . ?
O4 C23 1.446(3) . ?
O4 C24 1.461(3) . ?
C1 C28 1.378(4) . ?
C1 C2 1.379(4) . ?
C1 H1 0.9500 . ?
C2 C3 1.387(3) . ?
C2 H2 0.9500 . ?
C3 C4 1.395(3) . ?
C3 H3 0.9500 . ?
C4 C27 1.396(3) . ?
C5 C6 1.545(3) . ?
C5 C15 1.561(3) . ?
C5 H5 1.0000 . ?
C6 C7 1.527(3) . ?
C6 C25 1.540(3) . ?
C6 C24 1.555(3) . ?
C7 C23 1.492(3) . ?
C7 C8 1.519(3) . ?
C7 H7 1.0000 . ?
C8 C17 1.540(3) . ?
C8 C16 1.555(3) . ?
C8 C9 1.569(3) . ?
C9 C10 1.524(3) . ?
C9 C20 1.534(3) . ?
C9 H9 1.0000 . ?
C10 H10 1.0000 . ?
C11 C12 1.516(3) . ?
C11 H11A 0.9900 . ?
C11 H11B 0.9900 . ?
C12 H12A 0.9900 . ?
C12 H12B 0.9900 . ?
C13 H13A 0.9800 . ?
C13 H13B 0.9800 . ?
C13 H13C 0.9800 . ?
C14 H14A 0.9800 . ?
C14 H14B 0.9800 . ?
C14 H14C 0.9800 . ?
C15 C16 1.535(3) . ?
C15 H15A 0.9900 . ?
C15 H15B 0.9900 . ?
C16 H16 1.0000 . ?
C17 H17A 0.9900 . ?
C17 H17B 0.9900 . ?
C18 H18A 0.9800 . ?
C18 H18B 0.9800 . ?
C18 H18C 0.9800 . ?
C19 H19A 0.9800 . ?
C19 H19B 0.9800 . ?
C19 H19C 0.9800 . ?
C20 C21 1.317(3) . ?
C20 C22 1.534(3) . ?
C21 H21A 0.9500 . ?
C21 H21B 0.9500 . ?
C22 C23 1.517(3) . ?
C22 H22A 0.9900 . ?
C22 H22B 0.9900 . ?
C23 H23 1.0000 . ?
C24 H24A 0.9900 . ?
C24 H24B 0.9900 . ?
C25 H25A 0.9800 . ?
C25 H25B 0.9800 . ?
C25 H25C 0.9800 . ?
C26 H26A 0.9800 . ?
C26 H26B 0.9800 . ?
C26 H26C 0.9800 . ?
C27 C28 1.389(4) . ?
C27 H27 0.9500 . ?
C28 H28 0.9500 . ?
 
loop_
 _geom_angle_atom_site_label_1
 _geom_angle_atom_site_label_2
 _geom_angle_atom_site_label_3
 _geom_angle
 _geom_angle_site_symmetry_1
 _geom_angle_site_symmetry_3
 _geom_angle_publ_flag
C14 Si1 C26 108.24(11) . . ?
C14 Si1 C4 108.32(11) . . ?
C26 Si1 C4 108.16(10) . . ?
C14 Si1 C5 108.73(10) . . ?
C26 Si1 C5 118.30(10) . . ?
C4 Si1 C5 104.71(10) . . ?
C18 Si2 C13 110.14(11) . . ?
C18 Si2 C19 109.10(13) . . ?
C13 Si2 C19 110.24(13) . . ?
C18 Si2 C12 108.99(12) . . ?
C13 Si2 C12 108.30(11) . . ?
C19 Si2 C12 110.05(11) . . ?
C10 O1 C11 112.72(17) . . ?
C16 O2 HO2 108.4(19) . . ?
C10 O3 C17 110.04(16) . . ?
C23 O4 C24 109.32(16) . . ?
C28 C1 C2 119.4(2) . . ?
C28 C1 H1 120.3 . . ?
C2 C1 H1 120.3 . . ?
C1 C2 C3 119.9(2) . . ?
C1 C2 H2 120.0 . . ?
C3 C2 H2 120.0 . . ?
C2 C3 C4 121.9(2) . . ?
C2 C3 H3 119.1 . . ?
C4 C3 H3 119.1 . . ?
C3 C4 C27 117.1(2) . . ?
C3 C4 Si1 121.70(17) . . ?
C27 C4 Si1 121.21(18) . . ?
C6 C5 C15 107.89(17) . . ?
C6 C5 Si1 118.31(15) . . ?
C15 C5 Si1 116.05(14) . . ?
C6 C5 H5 104.3 . . ?
C15 C5 H5 104.3 . . ?
Si1 C5 H5 104.3 . . ?
C7 C6 C25 114.61(19) . . ?
C7 C6 C5 107.49(17) . . ?
C25 C6 C5 110.46(19) . . ?
C7 C6 C24 97.85(17) . . ?
C25 C6 C24 107.70(18) . . ?
C5 C6 C24 118.43(18) . . ?
C23 C7 C8 117.30(18) . . ?
C23 C7 C6 104.62(17) . . ?
C8 C7 C6 119.24(18) . . ?
C23 C7 H7 104.7 . . ?
C8 C7 H7 104.7 . . ?
C6 C7 H7 104.7 . . ?
C7 C8 C17 117.38(17) . . ?
C7 C8 C16 105.30(17) . . ?
C17 C8 C16 111.05(17) . . ?
C7 C8 C9 109.18(16) . . ?
C17 C8 C9 100.52(17) . . ?
C16 C8 C9 113.70(17) . . ?
C10 C9 C20 112.53(18) . . ?
C10 C9 C8 100.99(16) . . ?
C20 C9 C8 113.65(17) . . ?
C10 C9 H9 109.8 . . ?
C20 C9 H9 109.8 . . ?
C8 C9 H9 109.8 . . ?
O3 C10 O1 112.44(17) . . ?
O3 C10 C9 105.60(17) . . ?
O1 C10 C9 108.71(18) . . ?
O3 C10 H10 110.0 . . ?
O1 C10 H10 110.0 . . ?
C9 C10 H10 110.0 . . ?
O1 C11 C12 113.02(18) . . ?
O1 C11 H11A 109.0 . . ?
C12 C11 H11A 109.0 . . ?
O1 C11 H11B 109.0 . . ?
C12 C11 H11B 109.0 . . ?
H11A C11 H11B 107.8 . . ?
C11 C12 Si2 114.96(15) . . ?
C11 C12 H12A 108.5 . . ?
Si2 C12 H12A 108.5 . . ?
C11 C12 H12B 108.5 . . ?
Si2 C12 H12B 108.5 . . ?
H12A C12 H12B 107.5 . . ?
Si2 C13 H13A 109.5 . . ?
Si2 C13 H13B 109.5 . . ?
H13A C13 H13B 109.5 . . ?
Si2 C13 H13C 109.5 . . ?
H13A C13 H13C 109.5 . . ?
H13B C13 H13C 109.5 . . ?
Si1 C14 H14A 109.5 . . ?
Si1 C14 H14B 109.5 . . ?
H14A C14 H14B 109.5 . . ?
Si1 C14 H14C 109.5 . . ?
H14A C14 H14C 109.5 . . ?
H14B C14 H14C 109.5 . . ?
C16 C15 C5 116.34(17) . . ?
C16 C15 H15A 108.2 . . ?
C5 C15 H15A 108.2 . . ?
C16 C15 H15B 108.2 . . ?
C5 C15 H15B 108.2 . . ?
H15A C15 H15B 107.4 . . ?
O2 C16 C15 110.09(18) . . ?
O2 C16 C8 108.67(17) . . ?
C15 C16 C8 111.20(17) . . ?
O2 C16 H16 108.9 . . ?
C15 C16 H16 108.9 . . ?
C8 C16 H16 108.9 . . ?
O3 C17 C8 107.80(17) . . ?
O3 C17 H17A 110.1 . . ?
C8 C17 H17A 110.1 . . ?
O3 C17 H17B 110.1 . . ?
C8 C17 H17B 110.1 . . ?
H17A C17 H17B 108.5 . . ?
Si2 C18 H18A 109.5 . . ?
Si2 C18 H18B 109.5 . . ?
H18A C18 H18B 109.5 . . ?
Si2 C18 H18C 109.5 . . ?
H18A C18 H18C 109.5 . . ?
H18B C18 H18C 109.5 . . ?
Si2 C19 H19A 109.5 . . ?
Si2 C19 H19B 109.5 . . ?
H19A C19 H19B 109.5 . . ?
Si2 C19 H19C 109.5 . . ?
H19A C19 H19C 109.5 . . ?
H19B C19 H19C 109.5 . . ?
C21 C20 C9 124.5(2) . . ?
C21 C20 C22 118.2(2) . . ?
C9 C20 C22 117.29(19) . . ?
C20 C21 H21A 120.0 . . ?
C20 C21 H21B 120.0 . . ?
H21A C21 H21B 120.0 . . ?
C23 C22 C20 107.94(18) . . ?
C23 C22 H22A 110.1 . . ?
C20 C22 H22A 110.1 . . ?
C23 C22 H22B 110.1 . . ?
C20 C22 H22B 110.1 . . ?
H22A C22 H22B 108.4 . . ?
O4 C23 C7 102.76(17) . . ?
O4 C23 C22 114.27(18) . . ?
C7 C23 C22 108.76(18) . . ?
O4 C23 H23 110.3 . . ?
C7 C23 H23 110.3 . . ?
C22 C23 H23 110.3 . . ?
O4 C24 C6 106.54(17) . . ?
O4 C24 H24A 110.4 . . ?
C6 C24 H24A 110.4 . . ?
O4 C24 H24B 110.4 . . ?
C6 C24 H24B 110.4 . . ?
H24A C24 H24B 108.6 . . ?
C6 C25 H25A 109.5 . . ?
C6 C25 H25B 109.5 . . ?
H25A C25 H25B 109.5 . . ?
C6 C25 H25C 109.5 . . ?
H25A C25 H25C 109.5 . . ?
H25B C25 H25C 109.5 . . ?
Si1 C26 H26A 109.5 . . ?
Si1 C26 H26B 109.5 . . ?
H26A C26 H26B 109.5 . . ?
Si1 C26 H26C 109.5 . . ?
H26A C26 H26C 109.5 . . ?
H26B C26 H26C 109.5 . . ?
C28 C27 C4 121.0(2) . . ?
C28 C27 H27 119.5 . . ?
C4 C27 H27 119.5 . . ?
C1 C28 C27 120.7(2) . . ?
C1 C28 H28 119.7 . . ?
C27 C28 H28 119.7 . . ?
 
loop_
 _geom_hbond_atom_site_label_D
 _geom_hbond_atom_site_label_H
 _geom_hbond_atom_site_label_A
 _geom_hbond_distance_DH
 _geom_hbond_distance_HA
 _geom_hbond_distance_DA
 _geom_hbond_angle_DHA
 _geom_hbond_site_symmetry_A
O2 HO2 O4  0.795(17) 2.013(18) 2.792(2) 167(3) 1_655
 
_diffrn_measured_fraction_theta_max    0.983
_diffrn_reflns_theta_full              68.23
_diffrn_measured_fraction_theta_full   0.983
_refine_diff_density_max    0.258
_refine_diff_density_min   -0.321
_refine_diff_density_rms    0.073
